# Supplementary material
Source: publisher figshare collection journal article supplement (https://acs.figshare.com/ndownloader/files/5728980)

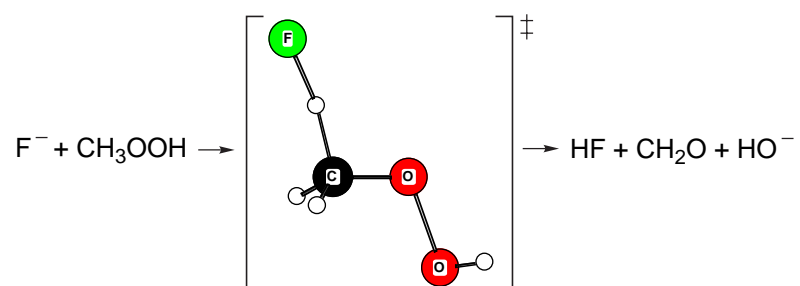

x 0.75

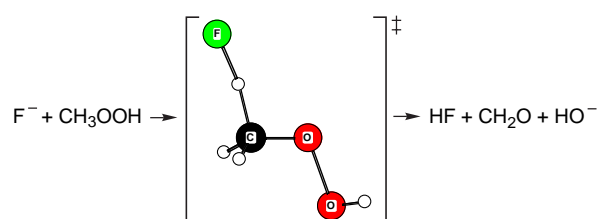

Supplement: Supplementary file 1 [file 5728980]
